# Supplementary material for: Proteomic characterization of the qualitative and quantitative differences in cervical mucus composition during the menstrual cycle
Source: Royal Society of Chemistry journal article supplement (doi:10.1039/c5mb00071h), 2015-04-23
Supplement: c5mb00071h1.xlsx [file c5mb00071h1.xlsx]

## Sheet: Common proteins
Accession	Description	ΣCoverage	Σ# Unique Peptides	MW [kDa]	calc. pI	Sequence	MH+ [Da]	Xcorr
P60709	Actin, cytoplasmic 1	28.27	9	41.7097	5.47803	VAPEEHPVLLTEAPLNPK	1954.07	2.78
						HQGVMVGMGQKDSYVGDEAQSKR	2507.18	3.72
						AGFAGDDAPR	976.45	2.1
						HQGVMVGMGQK	1171.57	2.01
						SYELPDGQVITIGNER	1790.89	2.84
						CPEALFQPSFLGMESCGIHETTFNSIMK	3231.47	5.53
						DSYVGDEAQSKR	1354.62	3.19
						AVFPSIVGRPR	1198.71	2.05
						HQGVMVGMGQK	1187.57	2.48
						AGFAGDDAPRAVFPSIVGRPR	2156.14	2.11
P04217	Alpha-1B-glycoprotein	16.77	4	54.2195	5.85889	TPGAAANLELIFVGPQHAGNYR	2296.18	4.25
						SWVPHTFESELSDPVELLVAES	2471.2	2.13
						CEGPIPDVTFELLREGETK	2190.08	1.65
						SLPAPWLSMAPVSWITPGLK	2151.17	3.91
P03973	Antileukoproteinase	78.79	23			AGVCPPKKSAQCLR	1571.82	2.67
						SCVSPVKA	847.435	2.12
						CCPDTCGIKCLDPVDTPNPTR	2476.07	4.06
						CLDPVDTPNPTR	1384.65	2.8
						CCMGMCGKSCVSPVKA	1831.75	3.41
						RCCPDTCGIKCLDPVDTPNPTR	2632.18	3.47
						DLKCCMGMCGK	1359.54	2.37
						KPGKCPVTYGQCLMLNPPNFCEMDGQCKR	3485.58	3.93
						CPVTYGQCLMLNPPNFCEMDGQCKR	3075.31	5.35
						YKKPECQSDWQCPGK	1910.85	4.12
						YKKPECQSDWQCPGKK	2038.95	3.08
						CPVTYGQCLMLNPPNFCEMDGQCK	2919.21	3.48
						KPECQSDWQCPGK	1619.69	2.84
						SFKAGVCPPKK	1218.67	2.68
						KRCCPDTCGIK	1394.63	2.82
						KPECQSDWQCPGKKR	1903.89	2.62
						CCMGMCGK	1003.33	2.43
						RCCPDTCGIK	1266.54	2.15
						AGVCPPKK	856.471	2.36
						CCPDTCGIK	1110.44	1.68
						SFKAGVCPPK	1090.57	2
						CLDPVDTPNPTRR	1540.76	2.03
						SAQCLR	734.362	1.29
P02647	Apolipoprotein A-I	17.6	5	30.7589	5.75732	LLDNWDSVTSTFSK	1612.79	3
						ATEHLSTLSEK	1215.62	2.21
						LAEYHAKATEHLSTLSEK	2028.04	3.13
						LAARLEALKENGGAR	1568.89	3.19
						LEALKENGGAR	1157.63	2.42
Q9UBG3	Cornulin	23.03	6	53.5016	6.1001	SQTSQAVTGGHTQIQAGSHTETVEQDR	2853.34	3.64
						AHQTGETVTGSGTQTQAGATQTVEQDSSHQTGR	3356.53	3.79
						EQDRAHQTGETVTGSGTQTQAGATQTVEQDSSHQTGRTSK	4200.93	3.02
						TEGNCTALTR	1122.52	2.34
						NQTTEMRPERQPQTR	1871.91	1.81
						ISPQIQLSGQTEQTQKAGEGKR	2384.25	1.72
P00738	Haptoglobin	32.76	10	45.1766	6.58057	ILGGHLDAKGSFPWQAK	1824.98	2.26
						SPVGVQPILNEHTFCAGMSK	2172.06	4.47597
						AVGDKLPECEAVCGKPK	1857.92	4.34437
						AVGDKLPECEADDGCPKPPEIAHGYVEHSVR	3432.6	3.95159
						SPVGVQPILNEHTFCAGMSK	2188.06	3.46733
						VTSIQDWVQK	1203.64	3.03445
						YQCKNYYKLR	1435.71	2.53
						YQCKNYYK	1166.53	1.6857
						ILGGHLDAK	923.531	1.58
						NYYKLR	856.468	1.21131
						TEGDGVYTLNNEKQWINK	2109.03	1.11573
P69905	Hemoglobin subunit alpha	94.37	20	15.2479	8.67529	VGAHAGEYGAEALER	1529.73	3.88
						AAWGKVGAHAGEYGAEALER	2043	4.26
						MFLSFPTTK	1071.56	2.1
						TYFPHFDLSHGSAQVKGHGKK	2341.19	3.14
						TYFPHFDLSHGSAQVK	1833.89	3.14
						TYFPHFDLSHGSAQVKGHGK	2213.09	3.37
						MFLSFPTTKTYFPHFDLSHGSAQVK	2886.43	1.99
						LRVDPVNFK	1087.63	2.42
						KVADALTNAVAHVDDMPNALSALSDLHAHK	3124.59	7.76
						VADALTNAVAHVDDMPNALSALSDLHAHKLR	3265.68	4.6
						VADALTNAVAHVDDMPNALSALSDLHAHK	2996.49	5.42
						VADALTNAVAHVDDMPNALSALSDLHAHKLRVDPVNFK	4065.1	5.5396
						VGAHAGEYGAEALERMFLSFPTTK	2582.28	4.06114
						KVADALTNAVAHVDDMPNALSALSDLHAHKLR	3393.77	3.64602
						VADALTNAVAHVDDMPNALSALSDLHAHK	3012.49	4.48
						LLSHCLLVTLAAHLPAEFTPAVHASLDKFLASVSTVLTSKYR	4577.5	3.15
						MFLSFPTTK	1087.55	2.17
						LLSHCLLVTLAAHLPAEFTPAVHASLDKFLASVSTVLTSK	4258.34	3.15
						LLSHCLLVTLAAHLPAEFTPAVHASLDK	3024.64	5.07
						TNVKAAWGK	974.542	3.07
						FLASVSTVLTSK	1252.72	2.89
						KVADALTNAVAHVDDMPNALSALSDLHAHK	3140.58	2.21
						VDPVNFK	818.441	1.53
P68871	Hemoglobin subunit beta	93.88	14	15.9883	7.28369	SAVTALWGKVNVDEVGGEALGR	2228.17	4.3212
						VLGAFSDGLAHLDNLKGTFATLSELHCDKLHVDPENFR	4237.12	3.77144
						VNVDEVGGEALGR	1314.66	3.97242
						LLGNVLVCVLAHHFGKEFTPPVQAAYQK	3136.68	4.85033
						EFTPPVQAAYQK	1378.7	2.1219
						GTFATLSELHCDKLHVDPENFR	2586.24	4.01635
						FFESFGDLSTPDAVMGNPK	2058.95	4.84911
						FFESFGDLSTPDAVMGNPKVK	2286.11	4.09745
						LLGNVLVCVLAHHFGK	1777	3.10217
						LLVVYPWTQRFFESFGDLSTPDAVMGNPKVK	3541.83	3.59073
						SAVTALWGK	932.521	2.10468
						EFTPPVQAAYQKVVAGVANALAHKYH	2809.48	2.61345
						FFESFGDLSTPDAVMGNPK	2074.94	4.32944
						LLVVYPWTQRFFESFGDLSTPDAVMGNPK	3314.66	3.48561
P02042	Hemoglobin subunit delta	92.52	7	16.0453	8.04541	NFGKEFTPQMQAAYQK	1887.91	4.33
						VLGAFSDGLAHLDNLKGTFSQLSELHCDKLHVDPENFR	4280.12	3.5
						TAVNALWGKVNVDAVGGEALGR	2197.17	3.47
						LLGNVLVCVLAR	1326.79	3.39
						EFTPQMQAAYQK	1441.68	1.91
						FFESFGDLSSPDAVMGNPK	2044.93	5.26
						VNVDAVGGEALGR	1256.66	3.58
P02790	Hemopexin	9.96	2	51.6433	7.02002	SLGPNSCSANGPGLYLIHGPNLYCYSDVEKLNAAK	3779.82	4.94
						YYCFQGNQFLR	1495.68	3.07
P23527	Histone H2B type 1-O	62.7	1	13.8976	10.3159	HAVSEGTKAVTKYTSSK	1793.94	3.19
P01876	Ig alpha-1 chain C region	70.25	9	37.6306	6.50732	SAVQGPPERDLCGCYSVSSVLPGCAEPWNHGK	3514.59	4.73239
						NFPPSQDASGDLYTTSSQLTLPATQCLAGK	3168.52	5.21002
						DASGVTFTWTPSSGK	1540.73	3.57333
						VFPLSLCSTQPDGNVVIACLVQGFFPQEPLSVTWSESGQGVTAR	4778.37	4.64997
						TFTCTAAYPESKTPLTATLSK	2288.15	3.79372
						DLCGCYSVSSVLPGCAEPWNHGK	2593.13	2.81457
						TFTCTAAYPESK	1375.62	3.02
						TPLTATLSK	931.547	2.05
						DLCGCYSVSSVLPGCAEPWNHGKTFTCTAAYPESKTPLTATLSK	4862.26	1.80632
P01877	Ig alpha-2 chain C region	64.71	5	36.503	6.1001	DASGATFTWTPSSGK	1512.7	2.95839
						NFPPSQDASGDLYTTSSQLTLPATQCPDGK	3196.48	3.12873
						SAVQGPPERDLCGCYSVSSVLPGCAQPWNHGETFTCTAAHPELK	4871.21	5.14917
						HYTNPSQDVTVPCPVPPPPPCCHPR	2909.33	4.7173
						DLCGCYSVSSVLPGCAQPWNHGETFTCTAAHPELK	3949.74	4.70819
P01857	Ig gamma-1 chain C region	61.52	8	36.0832	8.19189	SCDKTHTCPPCPAPELLGGPSVFLFPPKPK	3334.65	5.41
						SCDKTHTCPPCPAPELLGGPSVFLFPPKPKDTLMISR	4151.06	4.97216
						TPEVTCVVVDVSHEDPEVK	2139.03	3.74243
						TTPPVLDSDGSFFLYSK	1873.92	3.74356
						FNWYVDGVEVHNAK	1677.8	4.65
						THTCPPCPAPELLGGPSVFLFPPKPK	2844.46	2.4
						GPSVFPLAPSSK	1186.65	2.25
						TPEVTCVVVDVSHEDPEVKFNWYVDGVEVHNAK	3797.82	2.23
P01859	Ig gamma-2 chain C region	50	4	35.8778	7.59131	CCVECPPCPAPPVAGPSVFLFPPKPK	2908.41	5.47
						VSNKGLPAPIEK	1252.73	2.54
						TTPPMLDSDGSFFLYSK	1905.9	3.29
						TPEVTCVVVDVSHEDPEVQFNWYVDGVEVHNAK	3797.77	2.98
P01860	Ig gamma-3 chain C region	36.6	4	41.2604	7.89893	SCDTPPPCPR	1186.5	2.31
						TPLGDTTHTCPR	1355.64	3.05
						VELKTPLGDTTHTCPR	1824.93	2.75346
						VELKTPLGDTTHTCPRCPEPK	2436.2	2.58539
P01861	Ig gamma-4 chain C region	31.8	1	35.9179	7.35693	YGPPCPSCPAPEFLGGPSVFLFPPKPK	2943.46	4.85
P01834	Ig kappa chain C region	93.4	12	11.6017	5.87158	HKVYACEVTHQGLSSPVTK	2141.08	3.87503
						ADYEKHKVYACEVTHQGLSSPVTK	2747.35	3.97009
						VDNALQSGNSQESVTEQDSKDSTYSLSSTLTLSK	3619.71	6.1296
						VQWKVDNALQSGNSQESVTEQDSK	2677.27	5.37286
						VYACEVTHQGLSSPVTK	1875.93	4.71188
						TVAAPSVFIFPPSDEQLKSGTASVVCLLNNFYPR	3724.91	3.93289
						VQWKVDNALQSGNSQESVTEQDSKDSTYSLSSTLTLSK	4161.01	4.71982
						SGTASVVCLLNNFYPR	1797.9	3.27911
						VDNALQSGNSQESVTEQDSK	2135.97	4.18043
						TVAAPSVFIFPPSDEQLK	1946.03	2.6886
						TVAAPSVFIFPPSDEQLKSGTASVVCLLNNFYPREAK	4053.09	2.2502
						VDNALQSGNSQESVTEQDSKDSTYSLSSTLTLSKADYEK	4225.98	4.63983
P01620	Ig kappa chain V-III region SIE	22.02	2	11.7678	8.48486	EIVLTQSPGTLSLSPGER	1884.01	3.73867
						EIVLTQSPGTLSLSPGERATLSCR	2572.34	1.54953
P01717	Ig lambda chain V-IV region Hil	17.76	1	11.5096	6.50732	SYELTQPPSVSVSPGQTAR	2004	3.15
P0CG05	Ig lambda-2 chain C regions	96.23	5	11.2865	7.23975	AAPSVTLFPPSSEELQANKATLVCLISDFYPGAVTVAWKADSSPVK	4862.51	3.42908
						ADSSPVKAGVETTTPSK	2895.5	3.46
						ATLVCLISDFYPGAVTVAWK	1674.85	2.548
						SHRSYSCQVTHEGSTVEKTVAPTECS	2937.31	3.2
						SHRSYSCQVTHEGSTVEK	2091.95	2.55
P0CG06	Ig lambda-3 chain C regions	89.62	2	11.2305	7.23975	SHKSYSCQVTHEGSTVEKTVAPTECS	2909.3	3.105
						SHKSYSCQVTHEGSTVEK	2063.95	2.215
P01591	Immunoglobulin J chain	27.67	6	18.087	5.23682	CYTAVVPLVYGGETK	1656.83	2.68934
						SSEDPNEDIVER	1389.61	2.30062
						FVYHLSDLCK	1281.63	3.23244
						FVYHLSDLCKK	1409.72	2.73217
						IIRSSEDPNEDIVER	1771.88	2.3079
						IIRSSEDPNEDIVERNIR	2155.11	2.80711
O60282-2	Isoform 2 of Kinesin heavy chain isoform 5C	1.1	1	41.3	7.9	CELPKLEK	1016.54	2.12667
P05164-2	Isoform H14 of Myeloperoxidase	18.77	6	73.8066	9.11475	AVSNEIVRFPTDQLTPDQER	2315.17	4.10872
						WLPAEYEDGFSLPYGWTPGVKRNGFPVALAR	3493.78	1.95
						NQINALTSFVDASMVYGSEEPLAR	2612.27	5.26037
						SLMFMQWGQLLDHDLDFTPEPAAR	2818.33	4.163
						RSPTLGASNR	1058.57	2.92612
						IICDNTGITTVSK	1421.73	2.62192
P02788	Lactotransferrin	38.45	19	78.1319	8.11865	SVQWCAVSQPEATKCFQWQR	2496.16	2.93489
						NLLFNDNTECLAR	1579.76	2.72757
						CLAENAGDVAFVKDVTVLQNTDGNNNEAWAK	3363.6	7.57599
						SNLCALCIGDEQGENK	1807.8	4.0467
						SCHLAMAPNHAVVSR	1649.8	3.66307
						TTYEKYLGPQYVAGITNLKK	2287.24	3.18108
						FFSASCVPGADKGQFPNLCR	2258.05	2.94699
						LADFALLCLDGK	1335.7	3.35941
						VPSHAVVAR	935.543	1.91162
						IDSGLYLGSGYFTAIQNLR	2088.08	4.91373
						CAFSSQEPYFSYSGAFK	1975.86	4.89943
						SCHLAMAPNHAVVSR	1665.79	3.69116
						CLAENAGDVAFVK	1393.68	3.03406
						CGLVPVLAENYK	1362.71	2.92399
						SVQWCAVSQPEATK	1590.76	2.58222
						CLRDGAGDVAFIR	1449.73	2.3659
						FQLFGSPSGQKDLLFKDSAIGFSR	2645.37	1.94136
						LADFALLCLDGKRKPVTEAR	2273.25	2.73803
						QVLLHQQAK	1064.62	1.38658
						CSTSPLLEACEFLRK	1810.88	1.92273
P61626	Lysozyme C	73.65	12	16.5	9.16	YWCNDGKTPGAVNACHLSCSALLQDNIADAVACAK	3850.74	5.82405
						TPGAVNACHLSCSALLQDNIADAVACAK	2927.38	4.53797
						GISLANWMCLAK	1363.69	3.05839
						RVVRDPQGIR	1195.7	2.1508
						VVRDPQGIR	1039.6	1.83968
						RLGMDGYR	967.478	1.95032
						ATNYNAGDRSTDYGIFQINSR	2363.1	4.33423
						VFERCELAR	1179.59	2.07155
						VVRDPQGIRAWVAWR	1809	2.09354
						STDYGIFQINSR	1400.68	2.69093
						WESGYNTR	1012.45	1.39928
						AWVAWR	788.421	0.979273
P59665	Neutrophil defensin 1	59.57	7	10.2	6.99	YGTCIYQGRLWAFCC	1954.84	4.03163
						RYGTCIYQGRLWAFCC	2110.95	2.52128
						YGTCIYQGR	1117.51	2.58987
						RYGTCIYQGR	1273.61	2.21009
						IPACIAGER	986.508	2.44534
						IPACIAGERR	1142.61	1.99105
						ADEVAAAPEQIAADIPEVVVSLAWDESLAPK	3204.63	2.56507
P80188	Neutrophil gelatinase-associated lipocalin	40.4	7	22.6	8.91	SLGLPENHIVFPVPIDQCIDG	2320.17	3.80115
						ELTSELKENFIR	1478.79	2.6405
						VPLQQNFQDNQFQGKWYVVGLAGNAILR	3203.68	5.80152
						VPLQQNFQDNQFQGK	1790.88	4.91103
						WYVVGLAGNAILR	1431.81	3.28141
						TKELTSELKENFIR	1707.93	3.25944
						TFVPGCQPGEFTLGNIK	1864.93	3.19574
P07737	Profilin-1	47.14	5	15	8.27	SSFYVNGLTLGGQK	1470.76	3.48477
						CYEMASHLR	1166.51	2.24734
						TFVNITPAEVGVLVGKDR	1915.07	3.25615
						STGGAPTFNVTVTK	1379.72	2.20704
						EGVHGGLINKK	1151.65	2.26883
P06702	Protein S100-A9	91.23	14	13.2	6.13	NIETIINTFHQYSVK	1806.94	3.39692
						LGHPDTLNQGEFK	1455.72	2.4001
						VIEHIMEDLDTNADKQLSFEEFIMLMAR	3338.61	7.26896
						LGHPDTLNQGEFKELVRK	2081.11	2.67166
						VIEHIMEDLDTNADKQLSFEEFIMLMAR	3354.61	5.44086
						VIEHIMEDLDTNADK	1742.83	4.48001
						LGHPDTLNQGEFKELVR	1953.02	4.02827
						QLSFEEFIMLMAR	1614.8	3.22472
						KDLQNFLK	1005.57	2.55014
						DLQNFLKK	1005.57	2.42716
						MSQLER	763.377	2.08407
						LTWASHEK	971.494	1.99184
						MHEGDEGPGHHHKPGLGEGTP	2175.96	1.24111
						DLQNFLK	877.478	1.87555
						KDLQNFLKK	1133.67	2.44325
Q4W5P6	Protein TMEM155	15.38	1	14.2	10.26	LGTAVDAELMPSGAILQNKR	2084.12	1.90266
P20848	Putative alpha-1-antitrypsin-related protein	5.95	1	47.9	7.9	TEILEGLNVNLTETPEAK	1971.03	2.0921
P02787	Serotransferrin	69.91	34	77	7.12	CSTSSLLEACTFRRP	1784.84	2.93586
						SAGWNIPIGLLYCDLPEPR	2171.1	3.53927
						SAGWNIPIGLLYCDLPEPRKPLEK	2766.47	1.80057
						KCSTSSLLEACTFRRP	1912.94	3.60682
						AIAANEADAVTLDAGLVYDAYLAPNNLKPVVAEFYGSKEDPQTFYYAVAVVKK	5692.91	5.61552
						NLNEKDYELLCLDGTRKPVEEYANCHLAR	3520.7	3.85502
						LCMGSGLNLCEPNNKEGYYGYTGAFR	2971.32	5.11001
						IMNGEADAMSLDGGFVYIAGK	2159.02	3.0788
						WCAVSEHEATK	1317.59	3.31046
						SETKDLLFRDDTVCLAK	2011.02	2.99462
						SASDLTWDNLKGK	1434.72	2.59903
						SVIPSDGPSVACVKK	1543.81	2.16063
						SVIPSDGPSVACVK	1415.72	3.42846
						LKCDEWSVNSVGKIECVSAETTEDCIAK	3228.49	6.04982
						SMGGKEDLIWELLNQAQEHFGKDK	2789.36	5.59012
						AVANFFSGSCAPCADGTDFPQLCQLCPGCGCSTLNQYFGYSGAFK	4988.11	4.89353
						SMGGKEDLIWELLNQAQEHFGK	2546.24	4.57426
						NLNEKDYELLCLDGTR	1952.94	4.45725
						CSTSSLLEACTFR	1531.69	4.1357
						KPVDEYKDCHLAQVPSHTVVAR	2549.29	4.09381
						CLKDGAGDVAFVK	1379.7	3.54111
						DCHLAQVPSHTVVAR	1689.85	3.34709
						HQTVPQNTGGKNPDPWAK	1974.98	3.33054
						CLVEKGDVAFVK	1364.72	3.19362
						DSGFQMNQLR	1195.55	3.15025
						MYLGYEYVTAIR	1478.74	3.03479
						DLLFRDDTVCLAK	1565.8	2.96475
						FDEFFSEGCAPGSKK	1705.75	2.93983
						EGTCPEAPTDECKPVK	1817.81	2.73629
						SASDLTWDNLK	1249.61	2.70019
						IECVSAETTEDCIAK	1725.77	2.59743
						TAGWNIPMGLLYNK	1577.82	2.57646
						HSTIFENLANKADRDQYELLCLDNTR	3136.52	2.25328
						KASYLDCIR	1125.57	2.46249
P02768	Serum albumin	94.42	106	69.3	6.28	LKCASLQKFGER	1436.77	3.13244
						LVRPEVDVMCTAFHDNEETFLKKYLYEIAR	3686.84	4.94662
						YTKKVPQVSTPTLVEVSR	2032.15	3.99991
						RHPYFYAPELLFFAKR	2055.1	4.78725
						RHPDYSVVLLLR	1467.84	3.97395
						KVPQVSTPTLVEVSR	1639.94	3.18392
						KVPQVSTPTLVEVSRNLGK	2052.18	2.33918
						AVMDDFAAFVEK	1342.64	2.768
						SHCIAEVENDEMPADLPSLAADFVESK	2974.35	4.90573
						FKDLGEENFK	1226.61	2.78677
						LKECCEKPLLEK	1546.8	3.49554
						CCTESLVNR	1138.5	2.33988
						YICENQDSISSK	1443.64	2.82628
						KQTALVELVK	1128.7	2.18173
						DLGEENFK	951.442	1.8785
						TCVADESAENCDKSLHTLFGDKLCTVATLR	3411.6	5.29195
						VFDEFKPLVEEPQNLIKQNCELFEQLGEYKFQNALLVR	4625.38	5.68477
						LVRPEVDVMCTAFHDNEETFLKK	2778.36	6.83967
						RMPCAEDYLSVVLNQLCVLHEK	2674.32	6.64562
						LVNEVTEFAKTCVADESAENCDK	2629.18	6.08233
						LVRPEVDVMCTAFHDNEETFLK	2650.27	6.05338
						ALVLIAFAQYLQQCPFEDHVKLVNEVTEFAK	3620.89	4.31958
						MPCAEDYLSVVLNQLCVLHEKTPVSDRVTK	3501.75	5.89329
						YKAAFTECCQAADKAACLLPK	2416.15	4.30573
						RMPCAEDYLSVVLNQLCVLHEKTPVSDR	3329.65	5.97726
						VHTECCHGDLLECADDRADLAKYICENQDSISSK	4009.75	3.94428
						MPCAEDYLSVVLNQLCVLHEK	2518.22	6.10788
						TYETTLEKCCAAADPHECYAK	2518.07	5.00946
						VHTECCHGDLLECADDRADLAK	2585.12	3.39865
						QNCELFEQLGEYKFQNALLVR	2599.3	4.97111
						ALVLIAFAQYLQQCPFEDHVK	2490.29	4.40875
						AAFTECCQAADKAACLLPK	2124.99	4.07979
						SLHTLFGDKLCTVATLRETYGEMADCCAK	3347.56	3.78785
						LVTDLTKVHTECCHGDLLECADDRADLAK	3355.58	3.43297
						YICENQDSISSKLKECCEKPLLEK	2971.42	3.28881
						VFDEFKPLVEEPQNLIK	2045.1	3.31071
						RHPYFYAPELLFFAK	1899	3.67107
						EQLKAVMDDFAAFVEK	1840.92	4.13267
						LSQRFPKAEFAEVSK	1736.93	4.07703
						AVMDDFAAFVEKCCK	1790.79	4.05836
						ADDKETCFAEEGKK	1627.73	3.24125
						YKAAFTECCQAADK	1662.72	4.16669
						TCVADESAENCDK	1498.58	3.57192
						SLHTLFGDKLCTVATLR	1932.04	3.90227
						LDELRDEGKASSAK	1518.78	2.85991
						QEPERNECFLQHKDDNPNLPR	2636.23	3.23197
						CCKADDKETCFAEEGK	1947.79	2.69333
						MPCAEDYLSVVLNQLCVLHEKTPVSDR	3173.54	4.7695
						DVFLGMFLYEYAR	1623.79	2.24773
						RPCFSALEVDETYVPKEFNAETFTFHADICTLSEKER	4437.08	5.70332
						CASLQKFGER	1195.59	2.93432
						CCAAADPHECYAK	1552.6	3.41423
						CCTESLVNRRPCFSALEVDETYVPK	3030.41	2.78596
						LVNEVTEFAK	1149.62	2.83267
						AFKAWAVAR	1019.58	2.82195
						EFNAETFTFHADICTLSEKER	2545.17	3.32329
						AAFTECCQAADK	1371.57	2.44015
						ECCEKPLLEK	1305.62	2.1053
						LAKTYETTLEK	1296.7	2.54278
						ETYGEMADCCAK	1434.53	2.50083
						TPVSDRVTK	1002.56	2.23241
						QIKKQTALVELVK	1497.94	2.15065
						YLYEIAR	927.494	2.12866
						LSQRFPK	875.51	2.10132
						ADDKETCFAEEGK	1499.63	2.80532
						KLVAASQAALGL	1141.69	2.66595
						LKCASLQK	947.535	1.94051
						QTALVELVK	1000.6	1.95726
						YLYEIARR	1083.59	2.00699
						LDELRDEGK	1074.54	1.96147
						TYETTLEK	984.489	1.49128
						LVTDLTK	789.472	1.5316
						DAHKSEVAHRFK	1424.74	1.96568
						NLGKVGSK	802.478	1.69175
						VFDEFKPLVEEPQNLIKQNCELFEQLGEYK	3683.83	6.41688
						SHCIAEVENDEMPADLPSLAADFVESKDVCK	3492.56	6.18667
						DVCKNYAEAKDVFLGMFLYEYAR	2818.32	5.80449
						NYAEAKDVFLGMFLYEYAR	2316.1	4.94264
						EFNAETFTFHADICTLSEK	2260.02	3.49817
						VHTECCHGDLLECADDR	2086.84	4.75097
						HPYFYAPELLFFAKR	1899	3.59278
						AEFAEVSKLVTDLTK	1650.9	3.52925
						NECFLQHKDDNPNLPR	1996.93	2.92064
						TCVADESAENCDKSLHTLFGDK	2497.1	3.76918
						RPCFSALEVDETYVPK	1910.93	3.58708
						QNCELFEQLGEYK	1657.75	3.45544
						VPQVSTPTLVEVSR	1511.84	3.43669
						KYLYEIAR	1055.59	3.02795
						DVCKNYAEAK	1197.56	2.29815
						HPYFYAPELLFFAK	1742.9	2.37771
						FQNALLVR	960.563	2.07279
						SLHTLFGDK	1017.54	2.30296
						QEPERNECFLQHK	1714.8	2.03651
						AWAVAR	673.378	2.03249
						ETCFAEEGKK	1198.54	1.83188
						LCTVATLR	933.519	1.47727
						ATKEQLKAVMDDFAAFVEK	2141.09	4.14411
						YICENQDSISSKLK	1684.82	3.40515
						FGERAFKAWAVAR	1508.81	2.92053
						CCTESLVNRRPCFSALEVDETYVPKEFNAETFTFHADICTLSEK	5271.43	2.62493
						KQTALVELVKHKPK	1619	2.15509
						LVAASQAALGL	1013.6	1.60444
						DDNPNLPR	940.449	1.34941
						ADLAKYICENQDSISSKLK	2183.1	2.07369
						AEFAEVSK	880.441	1.75294
						NECFLQHK	1075.5	1.85833
Q9UBC9	Small proline-rich protein 3	84.02	12	18.1	8.57	VPVPGYTKLPEPCPSTVTPGPAQQK	2648.38	3.60179
						VPEPGCTKVPEPGCTKVPEPGCTK	2624.25	2.80434
						QTFTPPPQLQQQQVK	1767.94	1.8776
						VPEQGYTKVPVPGYTKLPEPCPSTVTPGPAQQK	3550.83	4.92937
						LPEPCPSTVTPGPAQQK	1806.91	4.55093
						VPEPGCTKVPEPGCTK	1755.84	3.7313
						VPQPGNTKIPEPGCTK	1722.89	2.54175
						QPSQPPPQEIFVPTTK	1793.94	2.49823
						VPEPGCTKVPEPGCTKVPEPGYTK	2627.29	2.44791
						EPCHSKVPQPGNTK	1578.77	2.08641
						IPEPGCTKVPEPGCTKVPEPGCTK	2638.26	1.72603
						VPEPGCTKVPEPGYTKVPEPGSIK	2566.32	1.59891
P62328	Thymosin beta-4	45.45	4	5.04952	5.05908	TETQEKNPLPSKETIEQEK	2229.13	3.66497
						NPLPSKETIEQEK	1512.79	2.79941
						TETQEKNPLPSK	1371.71	2.16664
						KTETQEKNPLPSK	1499.81	1.9687
Q14508	WAP four-disulfide core domain protein 2	51.61	8	12.9839	4.84326	NGCGKVSCVTPNF	1439.64	2.26488
						CCRNGCGKVSCVTPNF	1915.8	2.48677
						CCSAGCATFCSLPNDKEGSCPQVNINFPQLGLCRDQCQVDSQCPGQMK	5579.36	6.56741
						CCSAGCATFCSLPNDKEGSCPQVNINFPQLGLCR	3917.7	6.70105
						CCSAGCATFCSLPNDK	1847.72	4.00062
						EGSCPQVNINFPQLGLCR	2089	3.89826
						DQCQVDSQCPGQMK	1680.68	3.34038
						DQCQVDSQCPGQMKCCR	2156.84	3.10413
						DQCQVDSQCPGQMK	1696.68	3.52392

## Sheet: Pre-ovulatory
Accession	Description	ΣCoverage	Σ# Unique Peptides	MW [kDa]	calc. pI	Sequence	MH+ [Da]	Xcorr
Q9Y2I7	1-phosphatidylinositol 3-phosphate 5-kinase	0.62	1	236.986	6.69775	IVDVRPTLVLVEK	1480.91	2.16
P04083	Annexin A1	6.94	1	38.69	7.02002	GGPGSAVSPYPTFNPSSDVAALHK	2356.16	2.16
O95994	Anterior gradient protein 2 homolog	17.14	2	19.9666	8.99756	DSRPKLPQTLSR	1397.79	2.76
						LYAYEPADTALLLDNMKK	2069.06	1.63
P02652	Apolipoprotein A-II	33	2	11.1679	6.62451	VKSPELQAEAK	1199.66	1.7
						AGTELVNFLSYFVELGTQPATQ	2385.2	0.91
P02749	Beta-2-glycoprotein 1	7.54		38.2727	7.97217	FICPLTGLWPINTLK	1772.98	2.43
						ATVVYQGERVK	1249.69	2.3
P60022	Beta-defensin 1	33.82	1	7.41456	8.60205	SDHYNCVSSGGQCLYSACPIFTK	2651.13	5.03
Q8TDL5	BPI fold-containing family B member 1	14.46	5	52.4085	7.2251	ALGFEAAESSLTKDALVLTPASLWKPSSPVSQ	3300.74	4.07
						DALVLTPASLWKPSSPVSQ	1996.08	2.45472
						ALGFEAAESSLTK	1323.68	2.59
						AADKLGSTQIVK	1230.71	2.52264
						AAVAAVLSPEEFMVLLDSVLPESAHR	2751.44	2.47748
Q9NPI1	Bromodomain-containing protein 7	2	1	74.0922	6.39209	EMHLAEQVTNNLK	1526.76	1.82
Q9NRJ3	C-C motif chemokine 28	7.87	1	14.2704	10.1987	RNSNRAHQGK	1167.61	1.6
P08123	Collagen alpha-2(I) chain	2.78	2			HGNRGETGPSGPVGPAGAVGPR	2027.02	3.79
						SLNNQIETLLTPEGSR	1771.92	2.46
P02748	Complement component C9	5.19	1	63.1327	5.59229	LLRGTVIDVTDFVNWASSINDAPVLISQK	3171.71	2.61
P08603	Complement factor H	1.06	1	139.005	6.60986	MDGASNVTCINSR	1440.63	1.75
P01034	Cystatin-C	43.15	6	15.7891	8.74854	ALDFAVGEYNKASNDMYHSR	2288.04	4.14335
						LVGGPMDASVEEEGVR	1644.79	2.95508
						ALDFAVGEYNK	1226.61	2.49954
						AFCSFQIYAVPWQGTMTLSK	2335.13	2.18465
						LVGGPMDASVEEEGVRR	1800.89	1.53
						ALQVVR	685.436	1.32703
Q8NCM8	Cytoplasmic dynein 2 heavy chain 1	0.74	1	492.311	6.53662	GLDYFKPWLSSDTKQPFILVGPEGCGKGMLLR	3609.86	2.86
P68104	Elongation factor 1-alpha 1	7.58	1	50.1091	9.01221	IGGIGTVPVGRVETGVLKPGMVVTFAPVNVTTEVK	3521.98	2.97
P15328	Folate receptor alpha	26.85	3			CAVGAACQPFHFYFPTPTVLCNEIWTHSYK	3601.65	2.82
						TELLNVCMNAK	1292.63	2.75357
						HFIQDTCLYECSPNLGPWIQQVDQSWRK	3505.65	2.20738
Q08380	Galectin-3-binding protein	12.65	3	65.2893	5.2749	IYTSPTWSAFVTDSSWSAR	2162.02	3.40882
						GQWGTVCDNLWDLTDASVVCR	2452.1	3.36386
						AAFGQGSGPIMLDEVQCTGTEASLADCKSLGWLK	3597.71	2.95416
P80748	Ig lambda chain V-III region LOI	7.21	1	11.9278	5.08447	LTVLSQPK	885.541	1.8
P22692	Insulin-like growth factor-binding protein 4	12.02	2	27.9155	7.15186	GELDCHQLADSFRE	1676.73	2.63722
						EDARPVPQGSCQSELHR	1965.92	2.50486
Q8N6S4	Ankyrin repeat domain-containing protein 13C	4.15	1	56.9673	6.87354	IYKQGINIRLDTTLIDFTDMK	2514.34	2.25
Q9Y4D1	Disheveled-associated activator of morphogenesis 1	1.59	1	122.229	7.2251	ENSEESGEFDDLVSALR	1896.86	2.29
Q16270	Insulin-like growth factor-binding protein 7	6.09	1	28.8413	8.11865	AGAAAGGPGVSGVCVCK	1517.72	2.68
Q03405	Urokinase plasminogen activator surface receptor	9.25	1	31.2426	6.43018	SPEEQCLDVVTHWIQEGEEGRPKDDR	3109.43	2.59
P10909	Clusterin	8.39	2			EILSVDCSTNNPSQAK	1762.83	2.84
						KYNELLK	907.525	1.89178
P09466	Glycodelin	36.05	3	9.94607	5.05908	HLWYLLDLKQMEEPCRF	2278.12	5.15374
						VLVEDDEIMQGFIR	1663.84	4.2929
						HLWYLLDLK	1200.68	1.9379
Q9XRX5	HERV-H LTR-associating protein 3	31.58	1	8.63831	7.25439	HAGCDVTEMQRILSQPTFTEHLLR	2839.4	1.56
Q99996	A-kinase anchor protein 9	2.13	2	191.189	4.89404	LSQDQIGFQTFETVDVK	1954.97	1.18
						DKALCSLKEELIFAQEEK	2151.1	1.89
Q8N4C8	Misshapen-like kinase 1	1.02	1	143.548	7.12256	KGSVVNVNPTNTR	1385.75	2.28
Q9Y6F6	Protein MRVI1	4.86	1	65.8374	5.42725	FNALNLPGQTPSSSSIPSLPALSESPNGK	2910.51	2.51
P30044	Peroxiredoxin-5, mitochondrial	21.6	2	17.02	7.23975	LLADPTGAFGKETDLLLDDSLVSIFGNRR	3133.66	2.58
						AEGKVR	659.384	1.29
P02750	Leucine-rich alpha-2-glycoprotein	16.14	2	38.1541	6.94678	CAGPEAVKGQTLLAVAK	1712.94	2.17239
						NALTGLPPGLFQASATLDTLVLKENQLEVLEVSWLHGLK	4215.31	1.68984
Q38SD2	Leucine-rich repeat serine/threonine-protein kinase 1	0.74	1	225.249	6.68311	NNLKVFPDPWACPLK	1798.95	2.12
O75556	Mammaglobin-B	54.74	3	10.8763	5.78271	NFGLMMHTVYDSIWCNMK	2246.98	3.14168
						ELLQEFIDSDAAAEAMGKFK	2213.08	2.50335
						TINSDISIPEYKELLQEFIDSDAAAEAMGKFK	3573.77	2.10741
						NFGLMMHTVYDSIWCNMKSN	2448.06	1.51769
P01033	Metalloproteinase inhibitor 1	26.57	2	23.1555	8.104	TYTVGCEECTVFPCLSIPCKLQSGTHCLWTDQLLQGSEKGFQSR	5178.39	2.54811
						EPGLCTWQSLR	1346.65	1.62848
Q6UB28	Methionine aminopeptidase 1D, mitochondrial	10.75	1	37.0647	6.84424	KPDYVTTGIVPDWGDSIEVKNEDQIQGLHQACQLAR	4081.02	2.71
Q96PE7	Methylmalonyl-CoA epimerase, mitochondrial	13.07	1	18.7371	9.08545	AGGMHHICIEVDNINAAVMDLKK	2552.25	2.11
Q12851	Mitogen-activated protein kinase kinase kinase kinase 2	2.2	1	91.4981	6.34131	ELPQVCVGAEGPEGPGCR	1911.88	1.71
Q13232	Nucleoside diphosphate kinase 3	15.38	1	19.0029	7.84033	ALIGATNPADAPPGTIRGDFCIEVGK	2640.34	2.77
P30086	Phosphatidylethanolamine-binding protein 1	17.11	1	21.0437	7.53271	WSGPLSLQEVDEQPQHPLHVTYAGAAVDELGK	3471.72	3.73
P37108	Signal recognition particle 14 kDa protein	16.18	1	14.5608	10.0376	ISTVVSSKEVNKFQMAYSNLLR	2514.34	1.91
P02766	Transthyretin	34.01	3	15.877	5.75732	AADDTWEPFASGK	1394.62	3.30372
						RYTIAALLSPYSYSTTAVVTNPKE	2645.39	2.84574
						GSPAINVAVHVFR	1366.76	2.81469
Q9NYU1	UDP-glucose:glycoprotein glucosyltransferase 2	1.12	1	174.624	6.88818	MMNGLRNLGINGEDMSK	1911.88	1.66

## Sheet: Peri-ovulatory
Accession	Description	ΣCoverage	Σ# Unique Peptides	MW [kDa]	calc. pI	Sequence	MH+ [Da]	Xcorr
P01023	Alpha-2-macroglobulin	0.61	1	163.188	6.45557	SLNEEAVKK	1017.56	2.02
P18054	Arachidonate 12-lipoxygenase, 12S-type	2.11	1	75.6453	6.21436	LPGDNALDMFQKHR	1657.81	0.84
Q5TGY3	AT-hook DNA-binding motif-containing protein 1	1.06	1	168.245	9.0415	AAETFPKLVPPPSAMAR	1798.96	1.41
Q5PSV4	Breast cancer metastasis-suppressor 1-like protein	1.86	1	37.6055	5.14795	VAGIYR	678.393	0.83
Q08493	cAMP-specific 3',5'-cyclic phosphodiesterase 4C	1.98	1	67.7487	4.79248	ESGLDISPMCDK	1367.59	1.35
Q8IYX3	Coiled-coil domain-containing protein 116	1.36	1	56.9042	9.64209	EFNKEIK	907.489	0.91
Q8N4S0	Coiled-coil domain-containing protein 82	1.65	1	63.9628	5.0083	LESLVSRSR	1046.6	1.08
P12109	Collagen alpha-1(VI) chain	0.97	1	108.462	5.42725	NVQELKEAIK	1171.67	0.95
Q8WTW3	Conserved oligomeric Golgi complex subunit 1	1.53	1	108.909	7.31299	TQEIIPTQAKWQEVK	1798.96	0.92
P35462	D(3) dopamine receptor	1.63	1	40.7328	8.54346	GGELKR	659.384	1.62
P32926	Desmoglein-3	1.5	1	107.465	4.99561	YTGPYTFALEDQPVK	1728.85	3.26
Q8TEC5	E3 ubiquitin-protein ligase SH3RF2	0.82	1	79.2701	9.93506	QSRPFK	762.426	1.6
Q9P2K8	Eukaryotic translation initiation factor 2-alpha kinase 4	0.99	1	183.602	6.41748	YLKLVCDEIYNIKVEK	2027.09	1.64
Q5XX13	F-box/WD repeat-containing protein 10	0.6	1	113.904	9.37842	LQPNLK	712.435	1.78
P02751	Fibronectin	1.43	1	222.837	5.68115	VPHSRNSITLTNLTPGTEYVVSIVALNGR	3108.67	1.91
Q5CZC0	Fibrous sheath-interacting protein 2	0.69	1	391.458	7.81104	VFHYENLKPVVEPNQIQTTISPLK	2794.52	1.05
P08107	Heat shock 70 kDa protein 1A/1B	1.54	1	63.8979	5.70654	ITITNDKGR	1017.57	2.17
P42858	Huntingtin	1.02	1	347.383	6.20166	LYKVPLDTTEYPEEQYVSDILNYIDHGDPQVR	3809.85	1.87
Q9BYI3	Hyccin	1.54	1	57.589	8.1626	EMLTAQNR	978.467	1.16
Q8NI35	InaD-like protein	0.53	1	125.154	4.88135	IVELVK	700.461	0.94
P27816	Microtubule-associated protein 4	1.61	1	85.1994	7.7085	MAEPMKGYMRPTK	1555.75	1.21
Q13164	Mitogen-activated protein kinase 7	1.18	1	73.172	5.69385	KPVTAQER	928.525	1.57
O43148	mRNA cap guanine-N7 methyltransferase	2.1	1	54.8093	6.60986	KTFLEFYEEK	1333.67	1.44
Q13765	Nascent polypeptide-associated complex subunit alpha	0.86	1	94.6071	5.09717	QPVTKNNK	928.525	1.85
O94964	Protein SOGA1	1.87	1	115.755	5.49072	LAFSALGGGECGESLAELR	1936.95	1.88
Q9Y3P9	Rab GTPase-activating protein 1	2.17	1	67.0561	6.03662	DINRTFPAHDYFK	1623.79	0.54
O14795	Protein unc-13 homolog B	0.82	1	180.564	5.98584	TQNIIMAMKDRMK	1579.81	1.46
P08240	Signal recognition particle receptor subunit alpha	1.48	1	66.5166	9.0415	SDAPKEKGK	959.515	2.05
Q96PX8	SLIT and NTRK-like protein 1	1.58	1	77.6856	6.44287	NVSSLADLKPK	1171.67	0.83
Q9H3E2	Sorting nexin-25	1.31	1	97.8833	6.37939	ALKEVFDYSYR	1390.7	1.31
Q86TI0	TBC1 domain family member 1	1.11	1	133	6.96143	STLPNLGLVQMEK	1445.76	1.01
P23458	Tyrosine-protein kinase JAK1	0.78	1	133.191	7.54736	SEQVQGAQK	974.491	1.39
Q9NYU	UDP-glucose:glycoprotein glucosyltransferase 1	1.44	1	26.035	8.82178	VEEDVASDLVMKVDALLSAQPK	2357.22	2.93
Q92614	Unconventional myosin-XVIIIa	1.1	2	226.55	6.20166	GSVLQR	659.384	1.43
						DEQTSRNLTLFQAACR	1909.92	1.63
Q6ZQQ6	WD repeat-containing protein 87	0.66	1	332.975	7.28369	EQQVTEEQRHIQEEHKWAR	2461.19	1.94
Q86UP3	Zinc finger homeobox protein 4	0.67	1	393.482	6.3667	KVLQEASSPVPQETNSNTDNKPYK	2674.32	1.74
Q9Y6X8	Zinc fingers and homeoboxes protein 2	1.67	1	92.2498	6.85889	NGGDVVPQYYKDPK	1579.78	1.32
Q9H4I2	Zinc fingers and homeoboxes protein 3	1.46	1	104.592	6.07471	NQFPGQSEVEHLTK	1613.8	1.46

## Sheet: Post-ovulatory
Accession	Description	ΣCoverage	Σ# Unique Peptides	MW [kDa]	calc. pI	Sequence	MH+ [Da]	Xcorr
Q6SPF0	Atherin	2.79	1	56.0177	7.57666	AGGAARPVSLREVVR	1537.89	2.16103
Q8WXX0	Dynein heavy chain 7, axonemal	2.2	1	57.6493	7.35693	AEMEILPKPWR	1385.73	1.77251
Q9NS56	E3 ubiquitin-protein ligase UHRF2	3.58	1	56.041	7.78174	IERPGAHPLSFADGKFLR	2011.09	1.63054
Q14576	ELAV-like protein 3	5.99	1	39.5223	9.27588	FRLDNLLNMAYGVKSPLSLIAR	2507.39	2.63669
Q5VW36	Focadhesin OS=Homo sapiens	1.83	1	199.944	6.62451	QTSLALVHEVHIQLSEWHRAIFLPQAWLAYMNR	3958.07	2.81834
P48637	Glutathione synthetase	5.51	1	40.3238	5.10986	EGGGNNLYGEEMVQALKQLK	2194.08	2.40225
Q6UXS9	Inactive caspase-12	8.17	1	29.3804	6.21436	AGADTHGRLLQGNICNDAVTK	2211.11	3.23823
P01579	Interferon gamma	7.83	1	19.3359	9.46631	DDQSIQKSVETIK	1490.77	1.8
P13645	Keratin, type I cytoskeletal 10	3.42	1	58.7917	5.21143	SGGGGGGGGCGGGGGVSSLR	1549.68	3.66932
P05787	Keratin, type II cytoskeletal 8	2.9	1	53.6711	5.59229	DGKLVSESSDVLPK	1473.78	2.89054
Q99583	Max-binding protein MNT	1.89	1	62.2612	8.77783	LEQEREQEQKK	1444.73	1.97
P18669	Phosphoglycerate mutase 1	8.27	1	28.7858	7.18115	YADLTEDQLPSCESLKDTIAR	2425.15	2.12369
P00734	Prothrombin	2.09	1	69.9921	5.89697	TATSEYQTFFNPR	1561.73	2.20729
Q9C0H5	Rho GTPase-activating protein 39	1.2	1	121.21	7.50342	LAWEAQQAHFHMK	1612.77	1.91484
Q13813	Spectrin alpha chain, non-erythrocytic 1	0.49	1	282.108	5.33838	VLETAEDIQERR	1458.74	2.6065
P60174	Triosephosphate isomerase	7.19	1	17.9473	5.57959	SNVSDAVAQSTR	1234.6	2.49949
Q86VK4	Zinc finger protein 410	4.44	1	44.2258	6.56592	RIHTGEKPFLCEAQGCGR	2116.03	2.15
